# Supplementary material for: An insight into sensitive detection of metal ions using a novel cobalt MOF: single crystal, photoluminescence, and theoretical studies
Source: Royal Society of Chemistry journal article supplement (doi:10.1039/d2ce00385f), 2022-01-01
Supplement: d2ce00385f1.pdf [file d2ce00385f1.pdf]

## Supplementary information

### An Insight into Sensitive detection of Metal ions using a Novel Cobalt MOF: Single crystal, Photoluminescence, and theoretical studies

Love Karan Rana<sup>1</sup>, Prabhjyot Kaur<sup>1</sup>, Thierry Maris<sup>2</sup>, and Adam Duong<sup>1\*</sup>

#### Table of contents

|                                                                                                                                                                                                  |    |
|--------------------------------------------------------------------------------------------------------------------------------------------------------------------------------------------------|----|
| 1. Comparison of PXRD pattern of asynthesized <b>1</b> and patterns recorded after exposing the MOF ( <b>1</b> ) to different metal ions solutions with the simulated pattern (Fig. S1).....     | 2  |
| 2. Comparison of PXRD pattern of asynthesized <b>2</b> and its simulated pattern (Fig. S2) .....                                                                                                 | 3  |
| 3. Comparison of PXRD pattern of asynthesized <b>3</b> and its simulated pattern (Fig. S3).....                                                                                                  | 3  |
| 4. BFDH morphologies of <b>L1</b> , compound <b>1</b> and <b>2</b> (Fig. S4).....                                                                                                                | 4  |
| 5. <sup>1</sup> H-NMR of <b>L1</b> (Fig. S5).....                                                                                                                                                | 4  |
| 6. <sup>13</sup> C-NMR of <b>L1</b> (Fig. S6). .....                                                                                                                                             | 5  |
| 7. IR spectra comparison of <b>L1</b> , <b>H2BDC</b> , <b>1</b> and <b>3</b> (Fig. S7).<br>.....                                                                                                 | 6  |
| 8. IR spectra comparison of <b>L1</b> , <b>L3</b> , and compound <b>2</b> (Fig. S8). .....                                                                                                       | 7  |
| 9. Table S1- I.R table.....                                                                                                                                                                      | 8  |
| 10. a) ORTEP diagram of <b>L1</b> at 30% probability, b) showing dihedral angle between naphthalene and amide plane (Fig. S9). .....                                                             | 8  |
| 11. ORTEP diagram of compound <b>1</b> at 30% probability (Fig. S10) .....                                                                                                                       | 9  |
| 12. ORTEP diagram of compound <b>2</b> at 30% probability (Fig. S11). .....                                                                                                                      | 9  |
| 13. ORTEP diagram of compound <b>3</b> at 30% probability (Fig. S12) .....                                                                                                                       | 10 |
| 14. Thermal stability curve of compound <b>1</b> , <b>2</b> and <b>3</b> (Fig. S13). .....                                                                                                       | 10 |
| 15. Electrostatic potentials mapped on electron isodensity surface at 0.01 au. MEP plot a) for <b>L1</b> , and b) compound <b>1</b> (Fig. S14). .....                                            | 11 |
| 16. Quenching of fluorescence intensity of <b>1</b> by Cu <sup>+2</sup> , Fe <sup>+2</sup> , Pb <sup>+2</sup> , Cd <sup>+2</sup> , Co <sup>+2</sup> , and Cu <sup>+</sup> ions (Fig. S15). ..... | 11 |
| 17. Emission spectra and the corresponding Stern-Volmer plots of <b>1</b> in different a) Ru <sup>+3</sup> , b) Fe <sup>+3</sup> and c) Hg <sup>+2</sup> concentrations in DMF (Fig. S16). ..... | 12 |
| 18. Quenching of fluorescence of <b>1</b> by Ni <sup>+2</sup> , Be <sup>+2</sup> , Mn <sup>+2</sup> , and Zn <sup>+2</sup> ions (Fig. S17).....                                                  | 13 |

19. Showing the comparison of fluorescence quenching of **1** with **a)** different Fe(III) and **b)** Cu(II) salts (Fig. S18).....13
20. Illustrates negligible change in fluorescence intensity upon the addition of  $\text{ClO}_4^-$ ,  $\text{SCN}^-$ , and  $\text{Br}^-$  ions (Fig. S19). .....14
21. Table S2- Pertinent atomic parameters for **1**, **2**, and **3**.....14-17

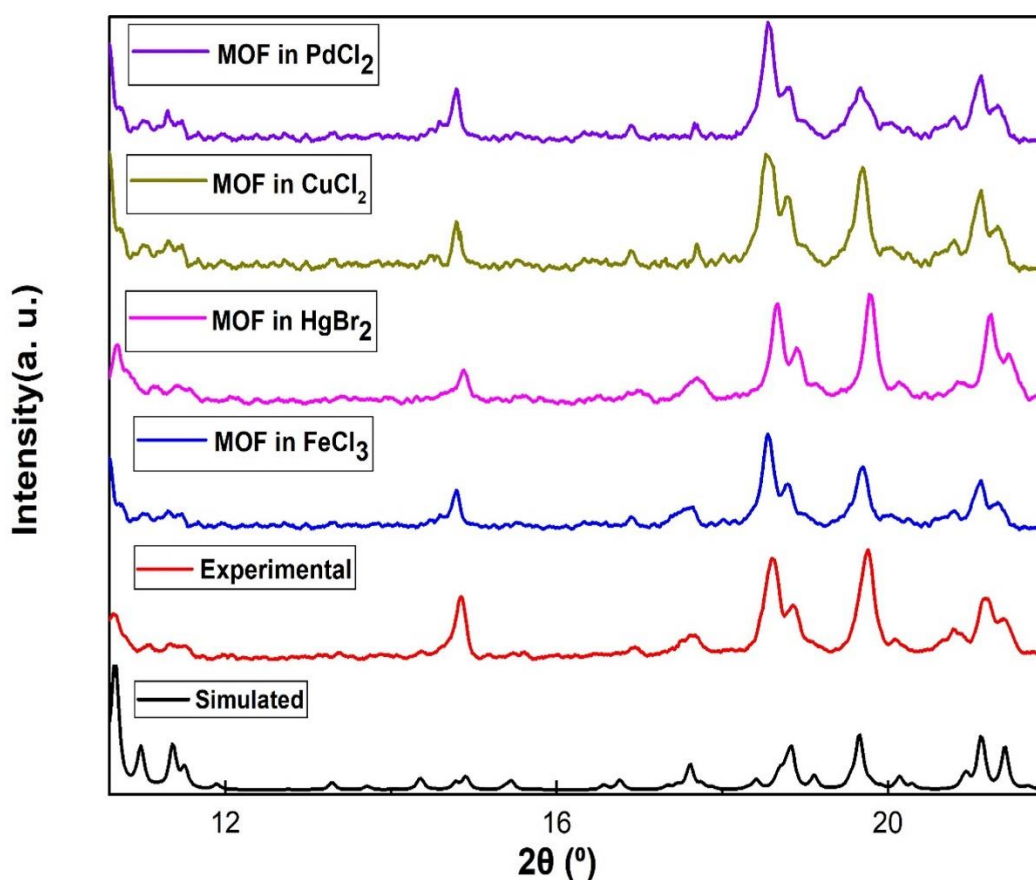

**Fig. S1-** Comparison of PXRD pattern of asynthesized compound **1** and patterns recorded after exposing **1** to different metal ions solutions with the simulated pattern.(Here compound **1** has been denoted as MOF for the illustration to be meaningful).

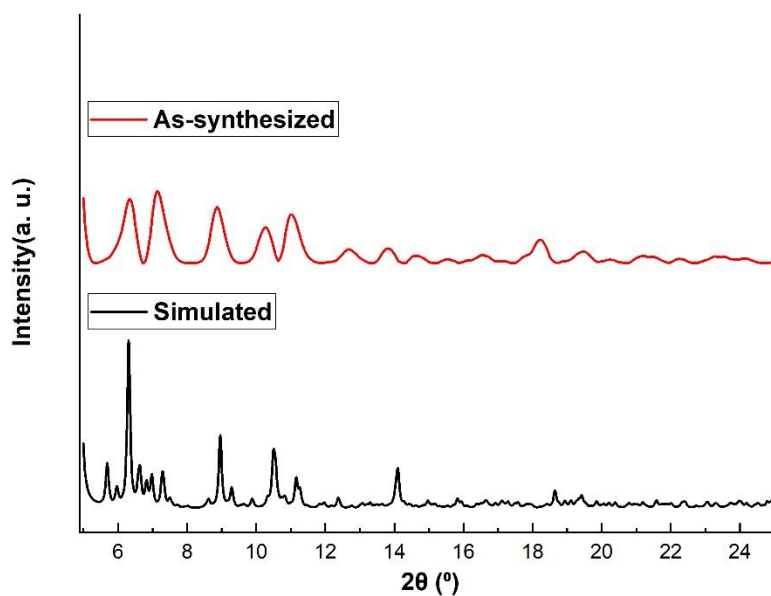

**Fig. S2-** Comparison of PXRd pattern of asynthesized compound **2** and its simulated pattern.

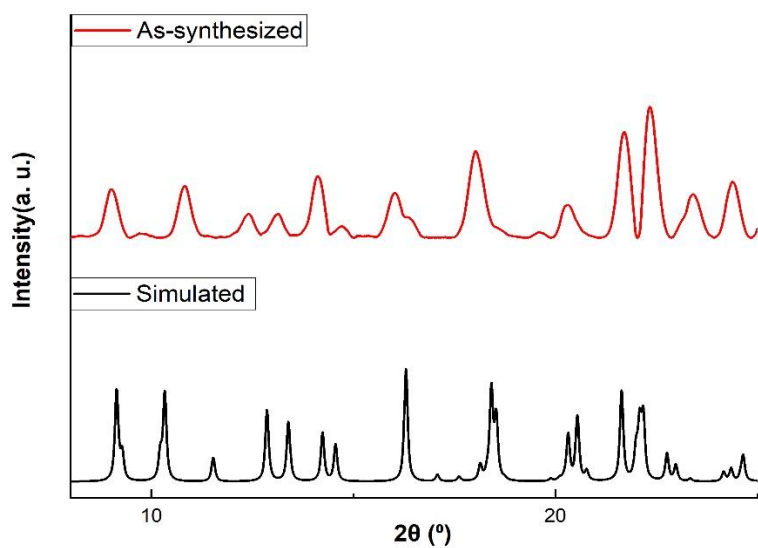

**Fig. S3-** Comparison of PXRd pattern of asynthesized compound **3** and its simulated pattern.

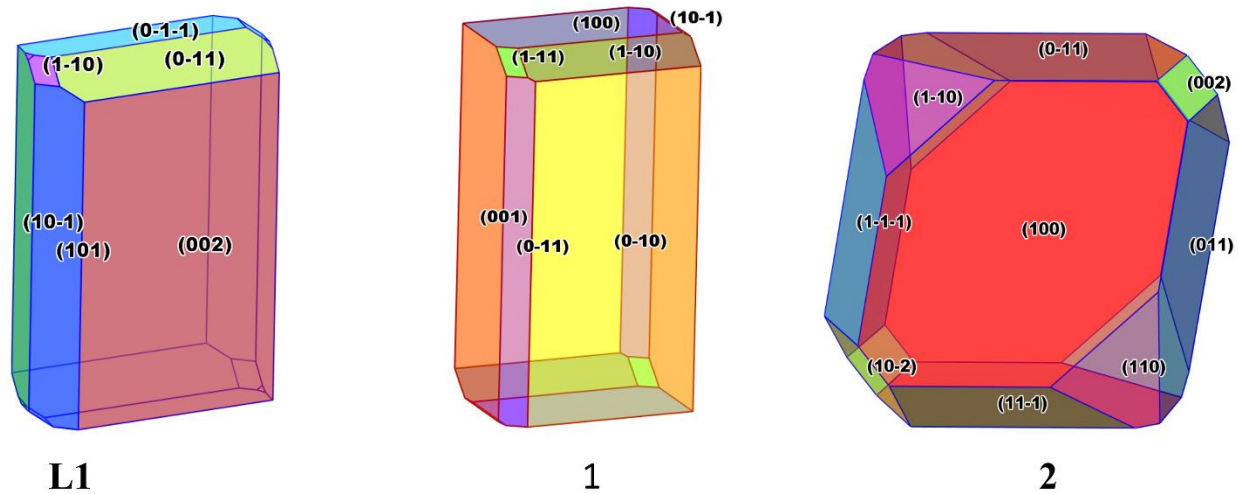

**Fig. S4-** BFDH morphologies of **L1**, compound **1** and **2**.

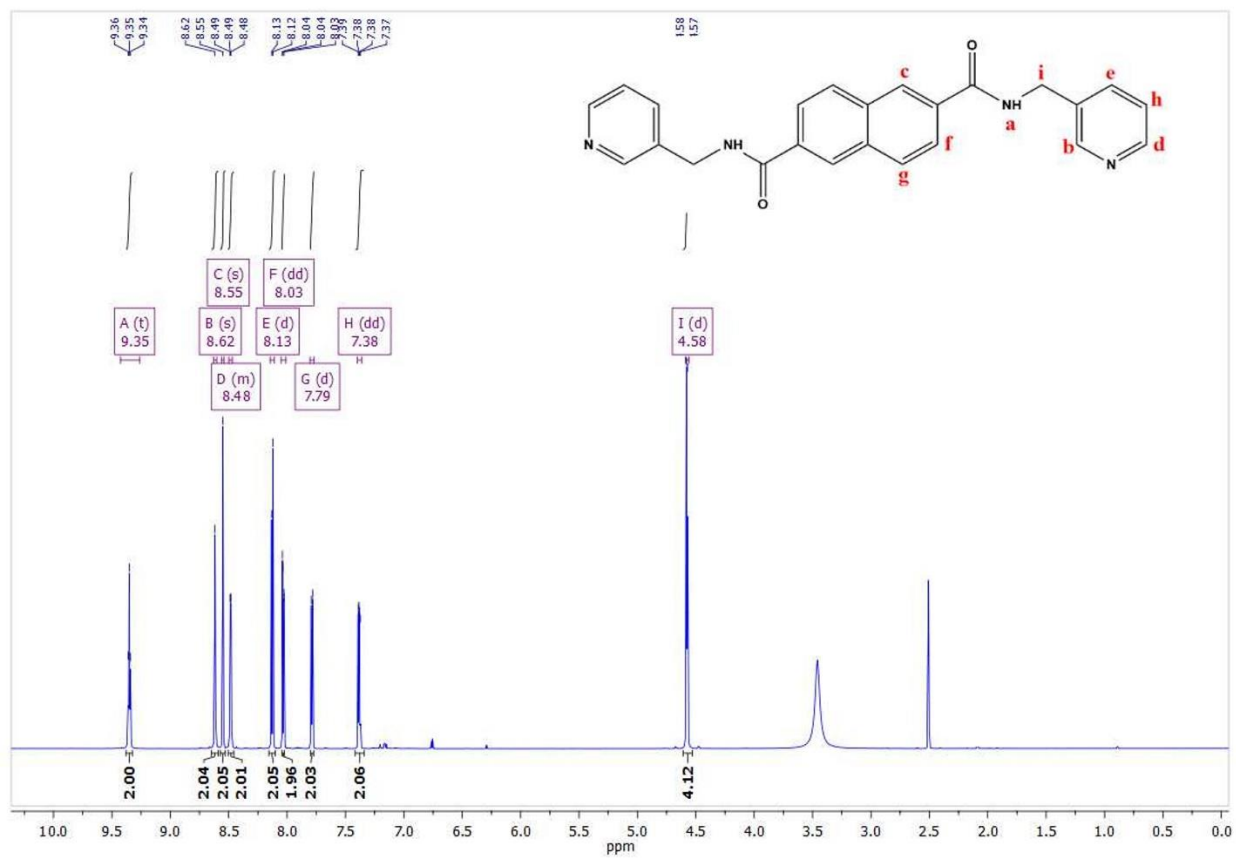

**Fig. S5**  $^1\text{H-NMR}$  of **L1**

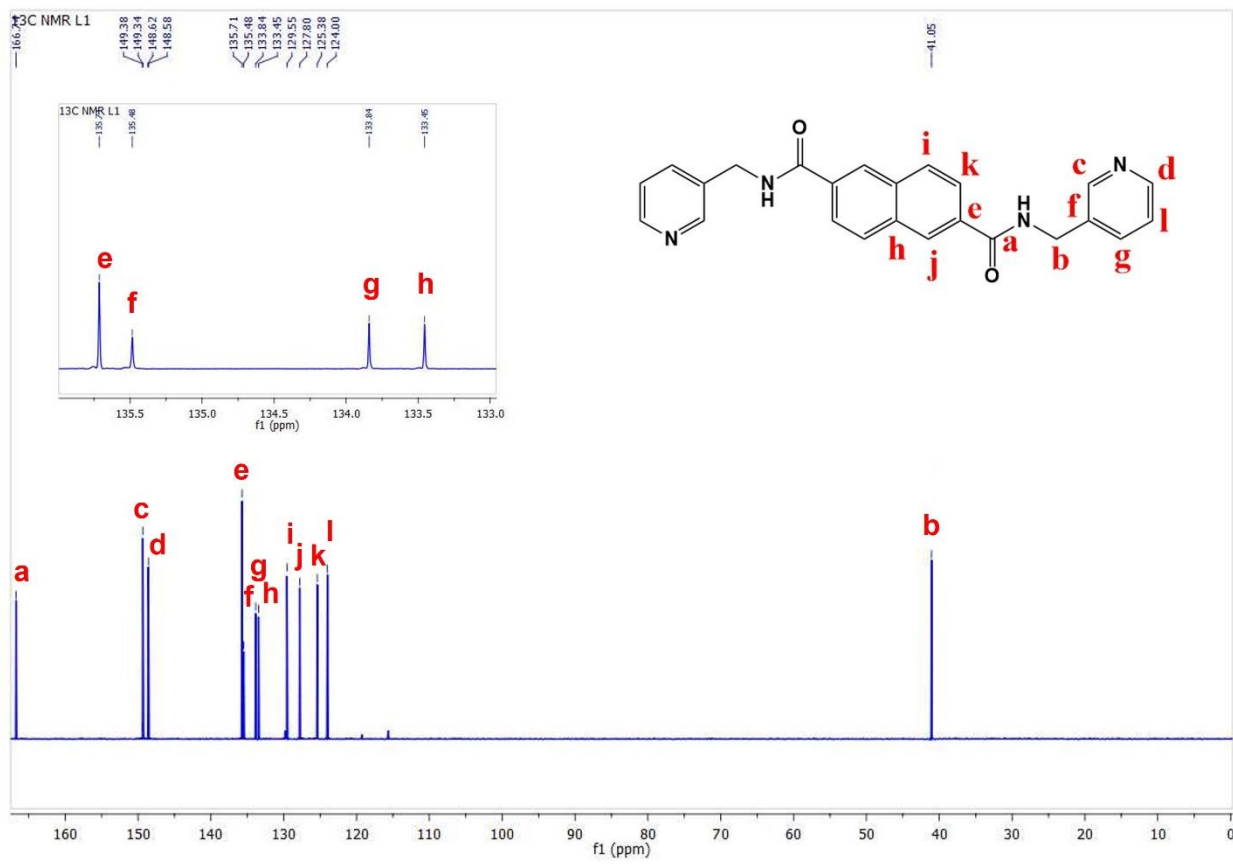

**Fig. S6**  $^{13}\text{C}$ -NMR of L1

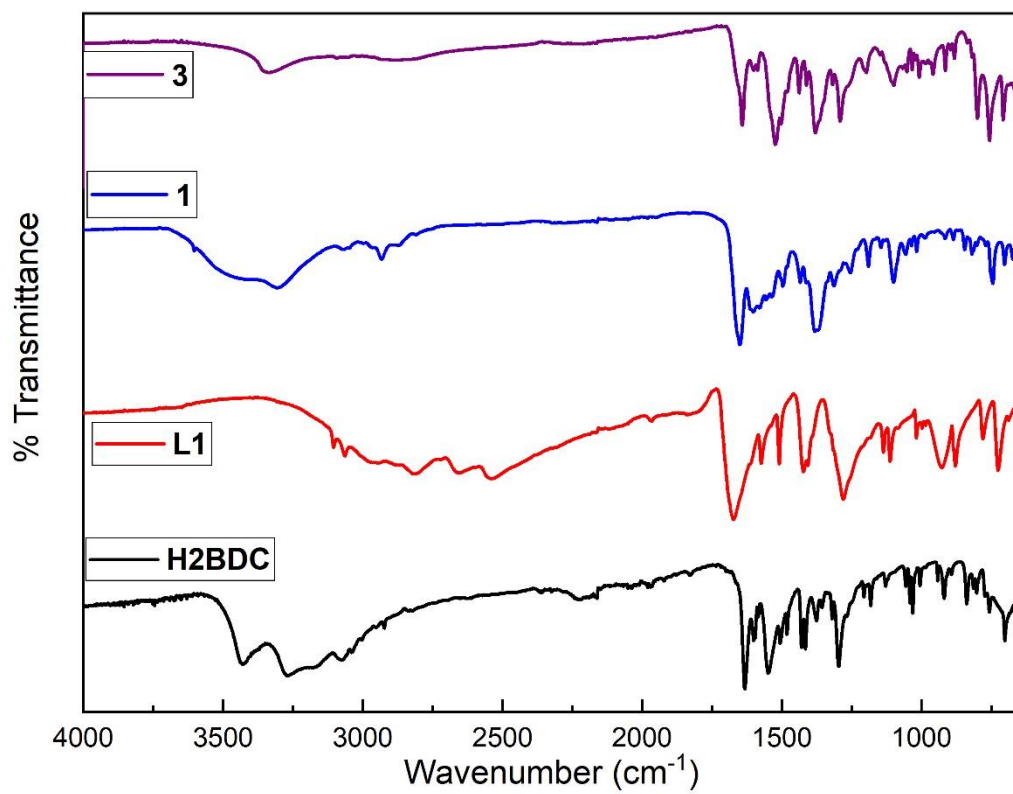

**Fig. S7** – IR spectra comparison of **L1**, **H2BDC**, and compound **1** and **3**.

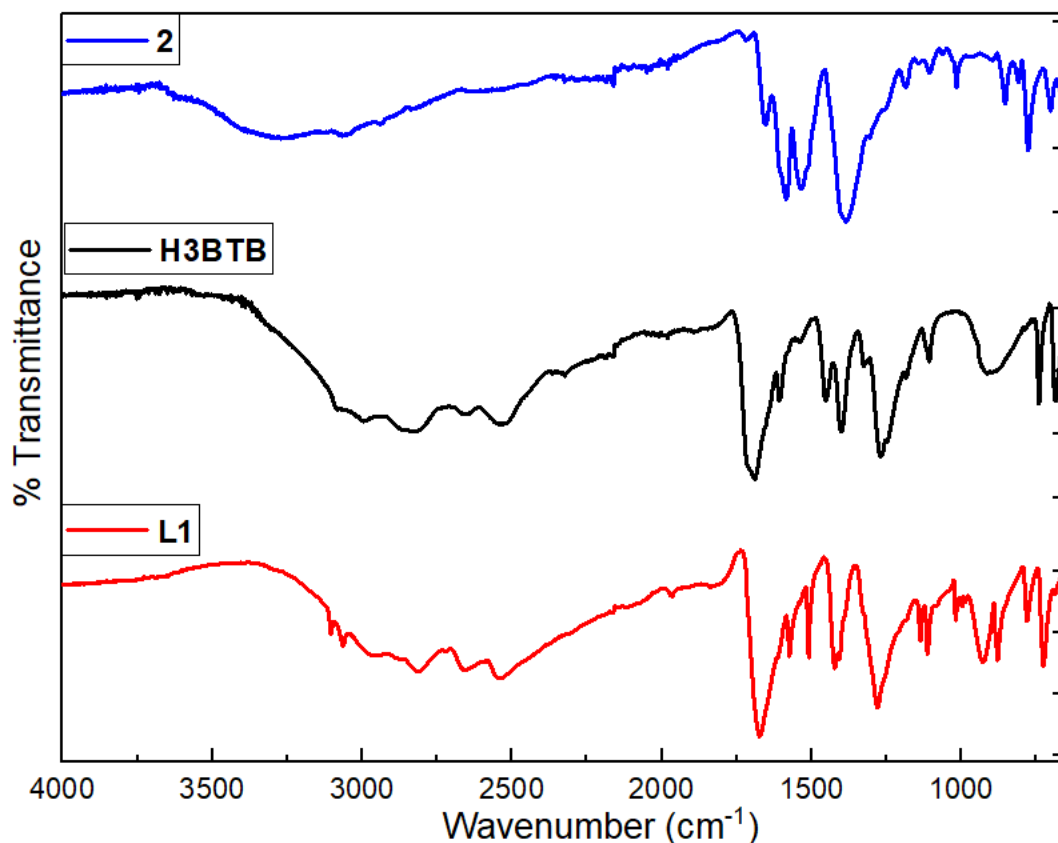

**Fig. S8** – IR spectra comparison of **L1**, **H3BTB**, and compound **2**.

From the IR spectra (Fig. S7) it is apparent that the peak at 1509 and 1574  $\text{cm}^{-1}$  (C=N stretching, pyridine ring) in **L1** (Red graph) slightly shifted in the spectra of compound **1** (blue graph) confirming the coordination of pyridine rings to Co(II) ions, while the peak at 1673  $\text{cm}^{-1}$  corresponds to C=O stretching of **L1** (amide group, red graph) is slightly shifted in **1** (1652  $\text{cm}^{-1}$ ) which might be due to the hydrogen bonding with solvent molecules (DMF) (Fig. S7). Similarly, the peak at 1631  $\text{cm}^{-1}$  (C=O stretching, carboxylic group) in **H2BDC** (black graph) is shifted and flattened at 1616  $\text{cm}^{-1}$  in the spectra of **1** (blue graph) which confirms the coordination of carboxylic groups to Co(II) ions (Fig. S7). In the case of **3**, respective spectral peaks confirms the coordination of ligands with Ni(II). In addition, a sharp band at 1523  $\text{cm}^{-1}$  and a weak band at 1593  $\text{cm}^{-1}$ , respectively, confirms the presence both free and coordinated carbonyl groups (carboxylic) (Fig. S7). A shift of 16  $\text{cm}^{-1}$  (from 1676  $\text{cm}^{-1}$  (**L1**) to 1660  $\text{cm}^{-1}$ ) in **2** (Fig. S8) was observed for C=O (amide) stretching, which might be due the hydrogen bonding between amide group and

lattice DMF molecules. Similarly, an observed shift in N-H (amide group) stretching frequency from 3104  $\text{cm}^{-1}$  (**L1**) to 3061  $\text{cm}^{-1}$  (**2**) is due to hydrogen bonding with DMF molecules.

**Table S1- IR table**

| Complex   | Group                              | Functionality      | Wavenumber ( $\text{cm}^{-1}$ ) |
|-----------|------------------------------------|--------------------|---------------------------------|
| <b>L1</b> | $\nu$ (N-H)                        | Amide              | 3105 (m, s)                     |
|           | $\nu$ (C=O)                        | Amide              | 1667(s)                         |
|           | $\nu$ (C=N)                        | Pyridine           | 1510 (m,s)                      |
|           | $\nu$ (C-H) <sub>bending</sub>     | Naphthalene        | 1417 (m, s)                     |
| <b>1</b>  | $\nu$ (N-H)                        | Amide              | 3286 (b)                        |
|           | $\nu$ (C=O)                        | Amide              | 1652 (s)                        |
|           | $\nu$ (C=N)                        | Pyridine           | 1491 (w)                        |
|           | $\nu$ (C-H) <sub>bending</sub>     | Naphthalene        | 1378 (m, s)                     |
|           | $\nu$ (C-H) <sub>Overtone</sub>    | Naphthalene        | 2870 (w)                        |
|           | $\nu$ (C-H)                        | Methyl group (DMF) | 2929 (w)                        |
| <b>2</b>  | $\nu$ (N-H)                        | Amide              | 3095 (w, b)                     |
|           | $\nu$ (C=O)                        | Amide              | 1662 (m)                        |
|           | $\nu$ (C=O)                        | Carboxylic         | 1590 (m, s)                     |
| <b>3</b>  | $\nu$ (N-H)                        | Amide              | 3335 (b)                        |
|           | $\nu$ (C=O)                        | Amide              | 1641 (m, s)                     |
|           | $\nu$ (C=O) <sub>free</sub>        | Carboxylic         | 1523 (s)                        |
|           | $\nu$ (C=O) <sub>Coordinated</sub> | Carboxylic         | 1593 (m, w)                     |

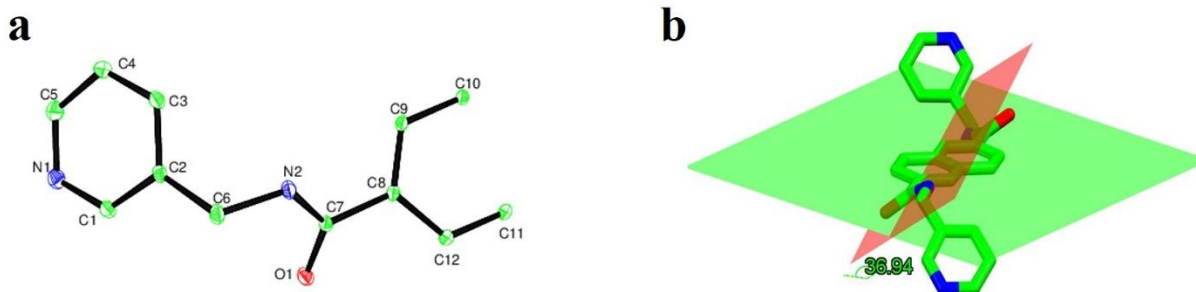

**Fig. S9** a) ORTEP diagram of **L1** at 30% probability, b) showing dihedral angle between naphthalene and amide plane.



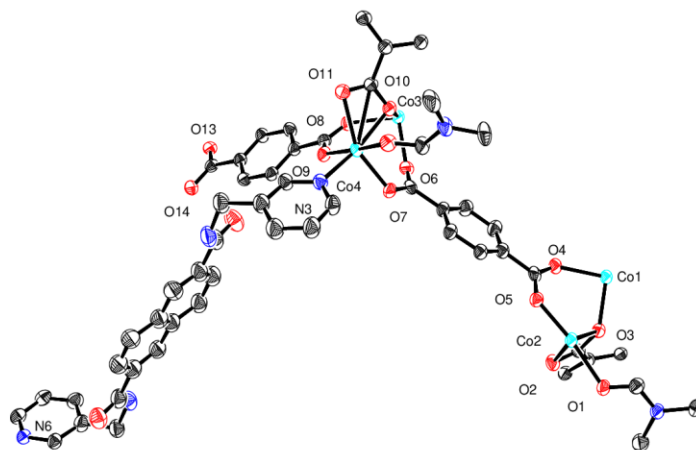

**Fig. S10** ORTEP diagram of **1** at 30% probability.

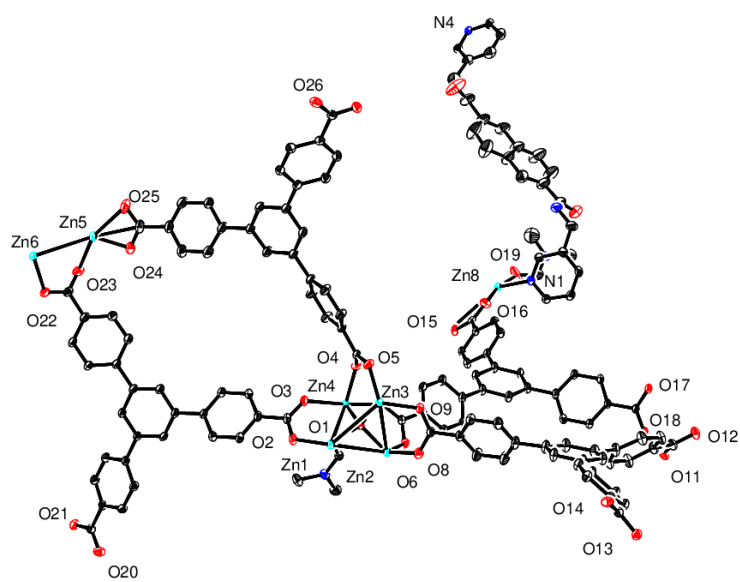

**Fig. S11** ORTEP diagram of **2** at 30% probability.

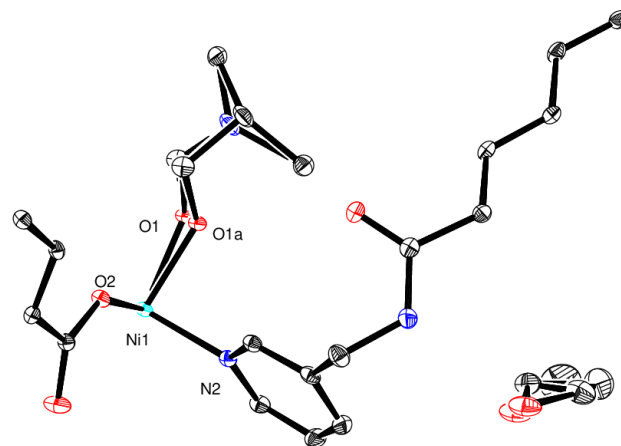

**Fig. S12** ORTEP diagram of **3** at 30% probability.

**Thermal stability-**

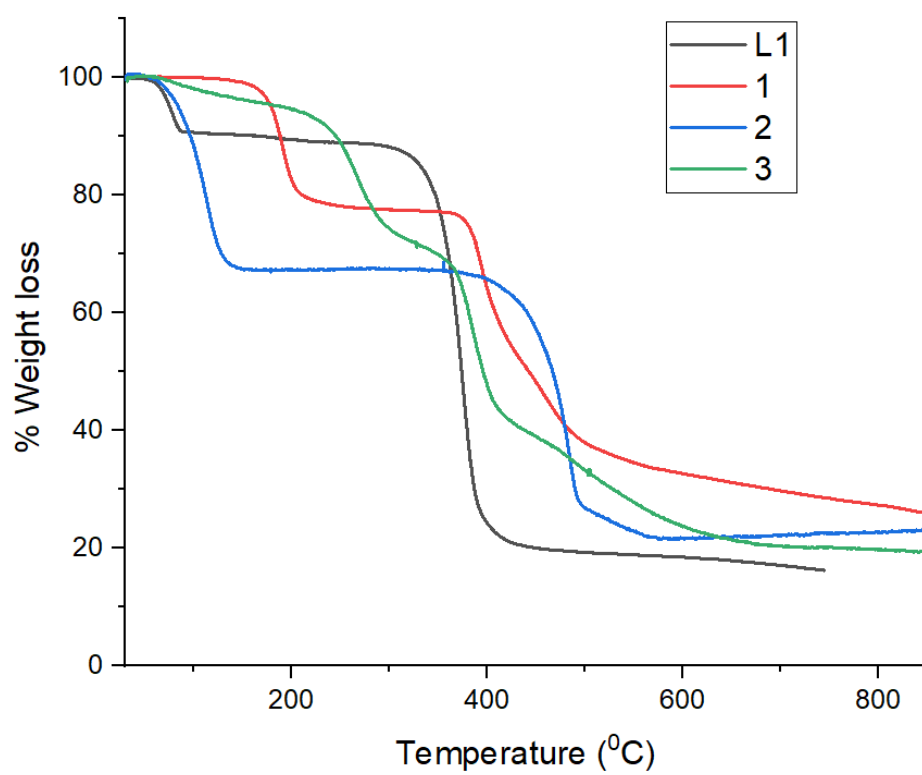

**Fig. S13** Thermal stability curves of **L1**, compound **1**, **2**, and **3**.

**a**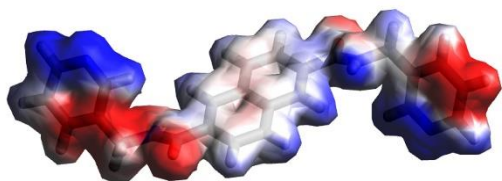**b**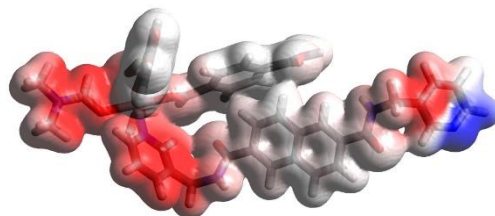

**Fig. S14** - Electrostatic potentials mapped on electron isodensity surface at 0.01 au. MEP plot a) for **L1**, and b) Co(II) complex using Avogadro software<sup>1</sup>. (RWB scheme was used, where red colour corresponds to high electron density regions and blue colour corresponds to least electron density regions)

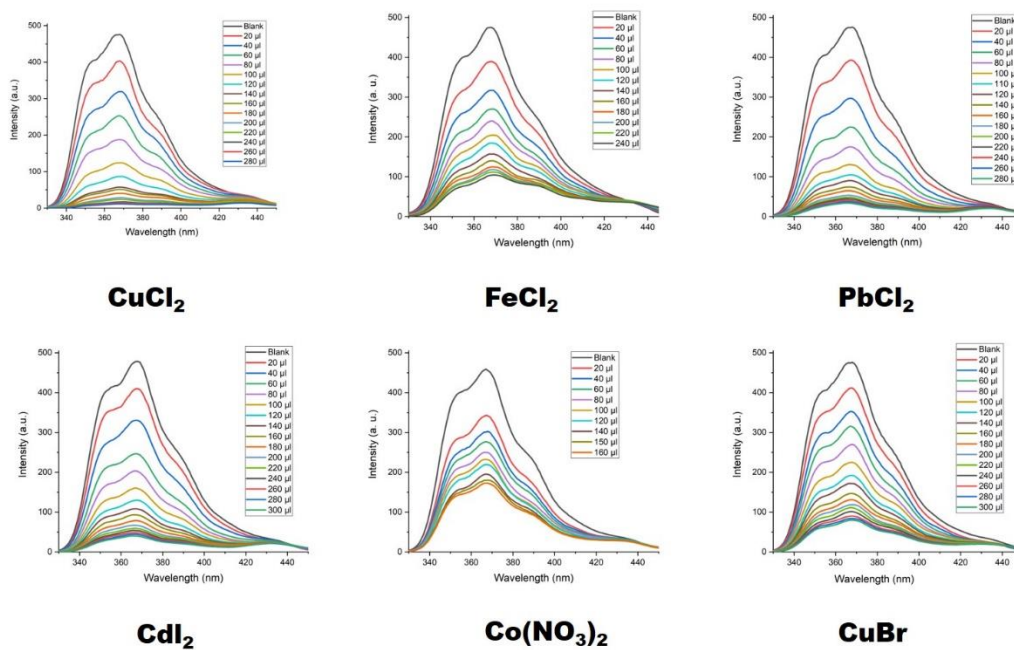

**Fig. S15** Quenching of fluorescence intensity of **1** by Cu<sup>+2</sup>, Fe<sup>+2</sup>, Pb<sup>+2</sup>, Cd<sup>+2</sup>, Co<sup>+2</sup>, and Cu<sup>+</sup> ions. (Note- Blank corresponds to the emission from **1** before the addition of analytes)

### Stern-Volmer plots

Stern-Volmer equation is used to find out the catalytic efficiency of analytes in a photophysical intermolecular deactivation process. The equation is  $(I_0/I) = K_{SV} [A] + 1$ , where in our case,  $I_0$  is the initial fluorescence intensity of **1** soaked in DMF,  $I$  is the fluorescence intensity in the presence of analyte,  $[A]$  is the molar concentration of analyte, and  $K_{SV}$  is the Stern-Volmer constant ( $M^{-1}$ ) or quenching constant.

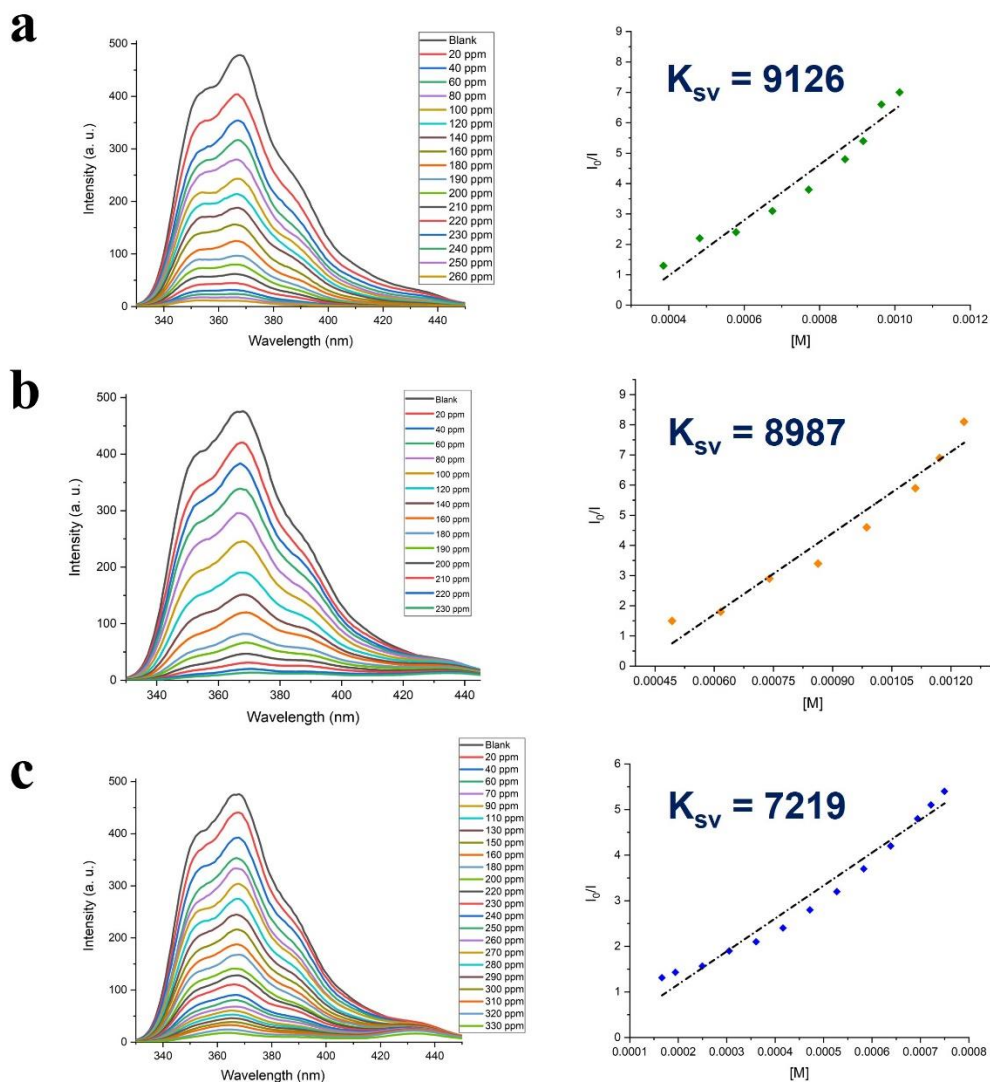

**Fig. S16-** Emission spectra and the corresponding Stern-Volmer plots of **1** in different a) Ru<sup>3+</sup>, b) Fe<sup>3+</sup> and c) Hg<sup>2+</sup> concentrations in DMF.

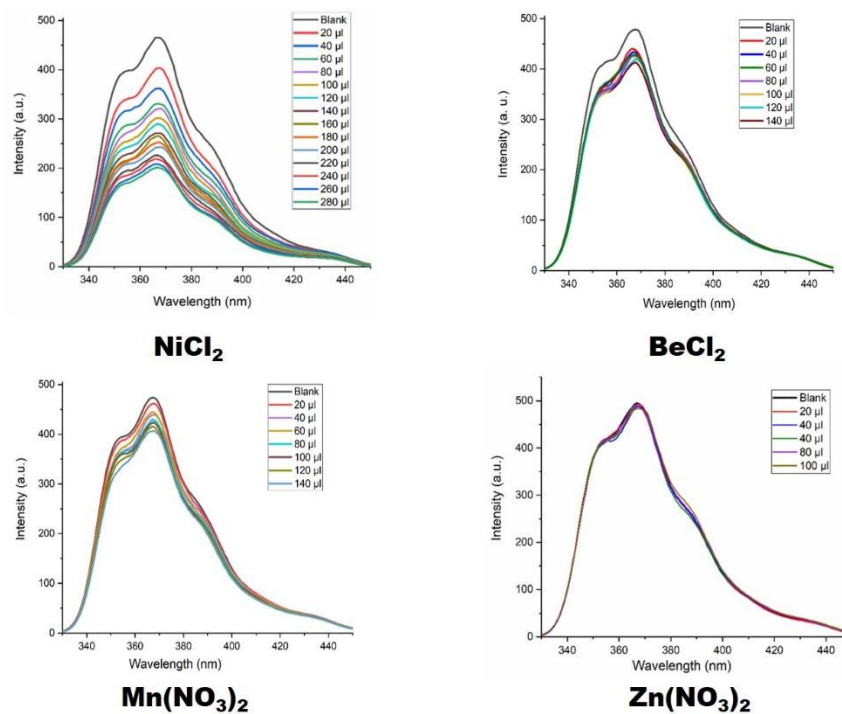

**Fig. S17** Quenching of fluorescence of **1** by  $\text{Ni}^{2+}$ ,  $\text{Be}^{2+}$ ,  $\text{Mn}^{2+}$ , and  $\text{Zn}^{2+}$  ions. (Note- Blank corresponds to the emission from **1** before the addition of analytes)

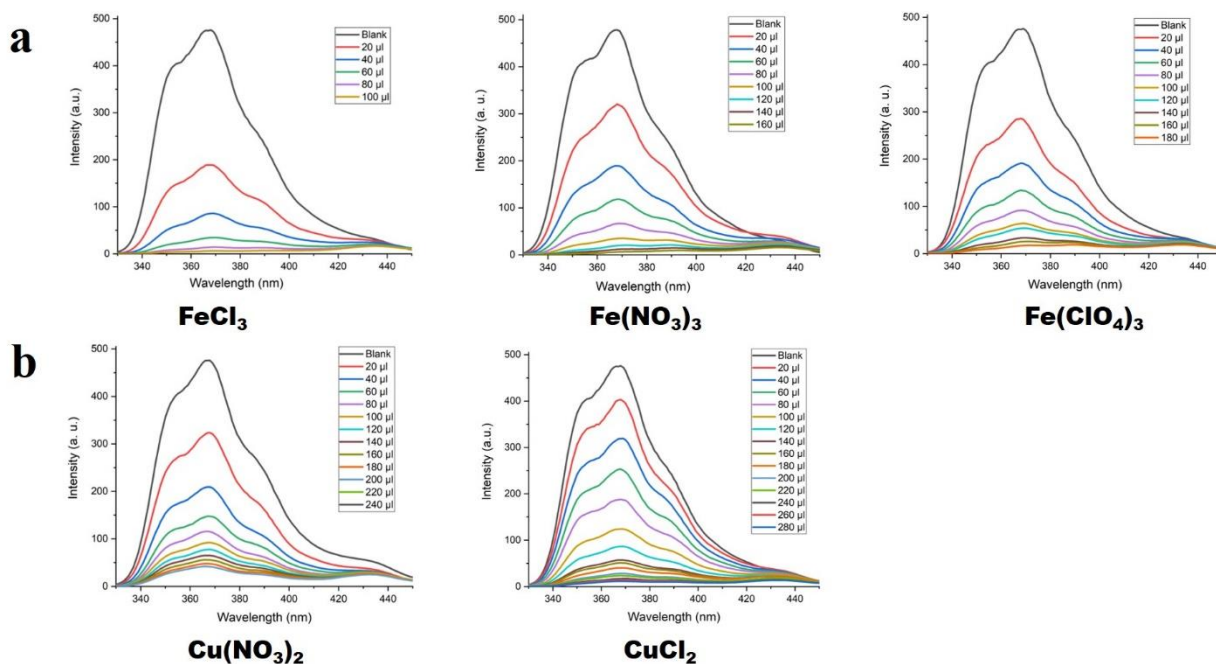

**Fig. S18** Comparison of fluorescence quenching of **1** with **a)** different Fe(III) and **b)** Cu(II) salts. (Note- Blank corresponds to the emission from Co-MOF before the addition of analytes)

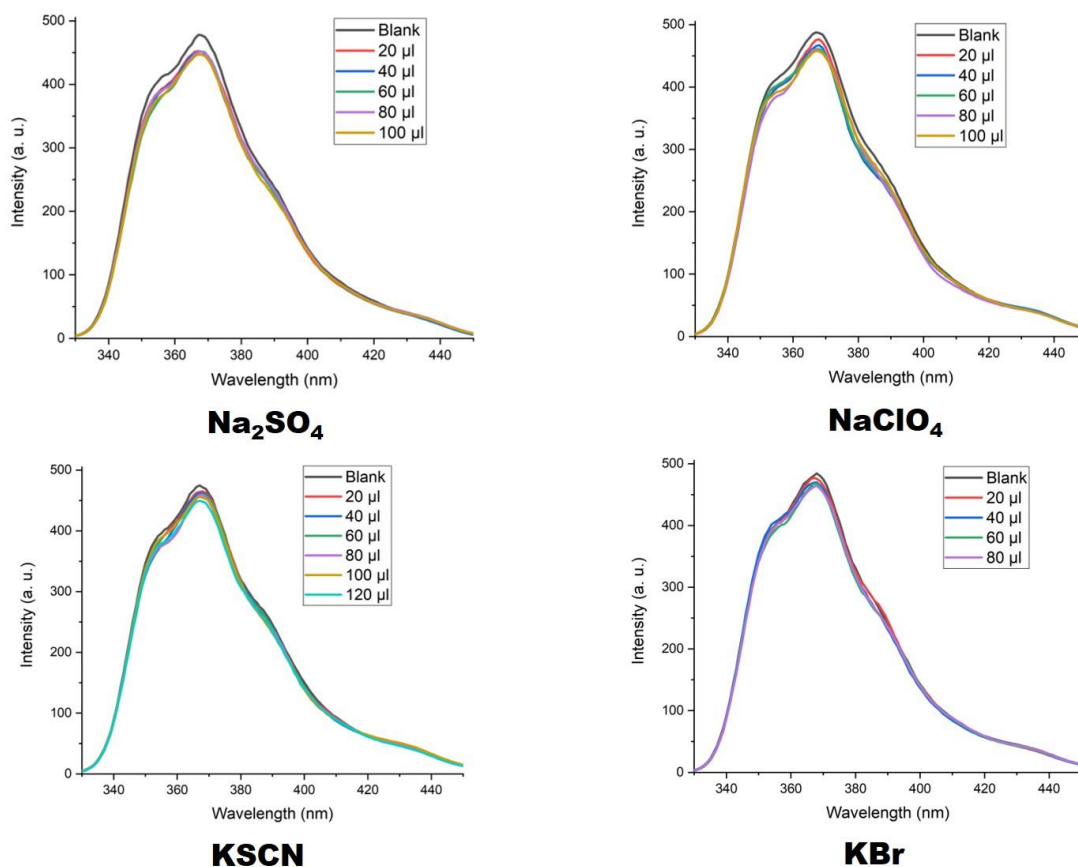

**Fig. S19** Illustrates negligible change in fluorescence intensity upon the addition of ClO<sub>4</sub><sup>-</sup>, SCN<sup>-</sup>, and Br<sup>-</sup> ions. (Note- Blank corresponds to the emission from **1** before the addition of analytes)

**Table S2-** Pertinent atomic parameters for compound **1**, **2**, and **3**.

| Bond lengths | <b>1</b>                      | <b>2</b>                      | <b>3</b>                       |
|--------------|-------------------------------|-------------------------------|--------------------------------|
|              | Co4-N3 2.150(10)              | Zn1-O1 1.919(2)               | Ni1-N2 2.118(2)                |
|              | Co2-N6 <sup>4</sup> 2.141(10) | Zn1-O2 1.908(2)               | Ni1-O1 2.072(15)               |
|              | Co1-O3 <sup>1</sup> 2.127(7)  | Zn1-O14 <sup>1</sup> 1.983(2) | Ni1-O2 <sup>3</sup> 2.0420(18) |
|              | Co1-O4 2.048(7)               | Zn1-O21 <sup>2</sup> 1.960(2) |                                |
|              | Co1-O13 <sup>2</sup> 2.066(6) | Zn2-O1 1.927(2)               |                                |
|              | Co1-O13 <sup>3</sup> 2.066(6) | Zn2-O6 1.935(2)               |                                |
|              | Co2-O1 2.154(7)               | Zn2-O8 1.980(2)               |                                |
|              | Co2-O2 2.237(7)               | Zn2-O13 <sup>1</sup> 1.960(2) |                                |
|              | Co2-O3 2.140(7)               | Zn3-O1 1.929(2)               |                                |
|              | Co2-O5 2.021(7)               | Zn3-O5 1.927(2)               |                                |

|                                               |                                                   |                                                 |
|-----------------------------------------------|---------------------------------------------------|-------------------------------------------------|
| Co2-O14 <sup>3</sup> 2.034(6)                 | Zn3-O9 1.959(2)                                   |                                                 |
| Co3-O6 2.069(7)                               | Zn3-O20 <sup>2</sup> 1.977(2)                     |                                                 |
| Co3-O8 <sup>5</sup> 2.054(6)                  | Zn4-O1 2.030(2)                                   |                                                 |
| Co3-O10 <sup>5</sup> 2.116(7)                 | Zn4-O3 2.198(2)                                   |                                                 |
| Co4-O7 2.047(7)                               | Zn4-O4 2.122(2)                                   |                                                 |
| Co4-O9 2.021(6)                               | Zn4-O7 2.112(2)                                   |                                                 |
| Co4-O10 2.140(8)                              | Zn4-O10 2.135(2)                                  |                                                 |
| Co4-O11 2.261(7)                              | Zn4-N4 <sup>3</sup> 2.102(3)                      |                                                 |
| Co4-O12 2.135(6)                              | Zn5-O9 <sup>4</sup> 1.951(2)                      |                                                 |
|                                               | Zn5-O23 2.020(3)                                  |                                                 |
|                                               | Zn5-O24 1.952(3)                                  |                                                 |
|                                               | Zn5-O25 2.384(3)                                  |                                                 |
|                                               | Zn5-O27 <sup>5</sup> 1.965(3)                     |                                                 |
|                                               | Zn6-O9 <sup>4</sup> 1.952(2)                      |                                                 |
|                                               | Zn6-O11 <sup>6</sup> 1.959(3)                     |                                                 |
|                                               | Zn6-O18 <sup>6</sup> 1.974(2)                     |                                                 |
|                                               | Zn6-O22 1.951(2)                                  |                                                 |
|                                               | Zn7-O9 1.925(2)                                   |                                                 |
|                                               | Zn7-O15 1.924(2)                                  |                                                 |
|                                               | Zn7-O17 <sup>5</sup> 1.961(2)                     |                                                 |
|                                               | Zn7-O26 <sup>7</sup> 1.954(3)                     |                                                 |
|                                               | Zn8-O9 1.953(2)                                   |                                                 |
|                                               | Zn8-O12 <sup>5</sup> 1.977(2)                     |                                                 |
|                                               | Zn8-O16 2.043(3)                                  |                                                 |
|                                               | Zn8-O19 2.272(4)                                  |                                                 |
|                                               | Zn8-N1 2.031(3)                                   |                                                 |
| <b>Bond angles</b>                            |                                                   |                                                 |
| O3-Co1-O3 <sup>1</sup> 180                    | O1-Zn1-O14 <sup>1</sup> 108.56(9)                 | O1 <sup>3</sup> -Ni1-N2 85.3(6)                 |
| O4-Co1-O3 92.2(3)                             | O1-Zn1-O21 <sup>2</sup> 111.96(10)                | O1-Ni1-N2 94.7(6)                               |
| O4-Co1-O3 <sup>1</sup> 92.2(3)                | O2-Zn1-O1 122.81(9)                               | O1A <sup>3</sup> -Ni1-O1A 180.00(17)            |
| O4-Co1-O3 <sup>1</sup> 87.8(3)                | O2-Zn1-O14 <sup>1</sup> 102.98(11)                | O1A <sup>3</sup> -Ni1-N2 <sup>3</sup> 85.32(14) |
| O4-Co1-O4 180.0(4)                            | O2-Zn1-O21 <sup>2</sup> 106.50(11)                | O1A <sup>3</sup> -Ni1-N2 94.68(14)              |
| O4-Co1-O13 <sup>2</sup> 85.8(3)               | O21 <sup>2</sup> -Zn1-O14 <sup>1</sup> 101.72(11) | N2-Ni1-N2 <sup>3</sup> 180.0                    |
| O4-Co1-O13 <sup>3</sup> 94.2(3)               | O1-Zn2-O6 115.29(9)                               | O2-Ni1-O1 <sup>3</sup> 90.5(7)                  |
| O13 <sup>2</sup> -Co1-O3 <sup>1</sup> 87.9(3) | O1-Zn2-O8 109.39(10)                              | O2-Ni1-O1 <sup>3</sup> 89.5(7)                  |
| O13 <sup>3</sup> -Co1-O3 <sup>1</sup> 92.1(3) | O1-Zn2-O13 <sup>1</sup> 113.61(9)                 | O2 <sup>3</sup> -Ni1-O1A 91.05(18)              |
| O13 <sup>2</sup> -Co1-O13 <sup>3</sup> 180.0  | O6-Zn2-O8 101.04(11)                              | O2 <sup>3</sup> -Ni1-O1A <sup>3</sup> 88.95(18) |
| O1-Co2-O2 82.9(3)                             | O6-Zn2-O13 <sup>1</sup> 105.44(11)                | O2-Ni1-N2 90.61(8)                              |
| O3-Co2-O1 84.0(3)                             | O13-Zn2-O8 111.37(10)                             | O2-Ni1-N2 <sup>3</sup> 89.39(8)                 |
| O3-Co2-O2 59.6(3)                             | O1-Zn3-O9 112.64(11)                              | O2-Ni1-O2 <sup>3</sup> 180                      |
| O3-Co2-N6 <sup>4</sup> 162.5(3)               | O1-Zn3-O20 <sup>2</sup> 108.15(10)                |                                                 |
| O5-Co2-O1 173.3(3)                            | O5-Zn3-O1 116.65(9)                               |                                                 |
| O5-Co2-O2 95.1(3)                             | O5-Zn3-O9 113.75(11)                              |                                                 |
| O5-Co2-O3 100.5(3)                            | O5-Zn3-O20 <sup>2</sup> 108.01(12)                |                                                 |
| O5-Co2-O14 <sup>3</sup> 98.8(3)               | O9-Zn3-O20 95.17(12)                              |                                                 |
| O5-Co2-N6 <sup>4</sup> 88.3(3)                | O1-Zn4-O3 93.19(8)                                |                                                 |
| O14 <sup>3</sup> -Co2-O1 85.5(3)              | O1-Zn4-O4 92.69(9)                                |                                                 |
| O1-Co2-O2 153.9(3)                            | O1-Zn4-O7 94.01(9)                                |                                                 |
| O14 <sup>3</sup> -Co2-O3 96.1(3)              | O1-Zn4-O10 88.67(9)                               |                                                 |
| O14 <sup>3</sup> -Co2-N6 <sup>4</sup> 97.5(3) | O1-Zn4-N4 178.66(10)                              |                                                 |

|                                               |                                                   |  |
|-----------------------------------------------|---------------------------------------------------|--|
| N6 <sup>4</sup> -Co2-O1 86.1(3)               | O4-Zn4-O3 90.32(9)                                |  |
| N6 <sup>4</sup> -Co2-O2 104.9(3)              | O4-Zn4-O10 174.61(9)                              |  |
| O6-Co3-O6 180.0(3)                            | O7-Zn4-O3 172.79(9)                               |  |
| O6-Co3-O10 <sup>5</sup> 91.4(3)               | O7-Zn4-O4 89.08(10)                               |  |
| O6 <sup>5</sup> -Co3-O10 <sup>5</sup> 88.6(3) | O7-Zn4-O10 96.03(10)                              |  |
| O6-Co3-O10 88.6(3)                            | O10-Zn4-O3 84.39(9)                               |  |
| O6-Co3-O10 91.4(3)                            | N4-Zn4-O3 85.48(10)                               |  |
| O8 <sup>5</sup> -Co3-O6 85.5(3)               | N4 <sup>3</sup> -Zn4-O4 87.09(10)                 |  |
| O8 <sup>5</sup> -Co3 O6 <sup>5</sup> 94.5(3)  | N4 <sup>3</sup> -Zn4-O7 87.31(10)                 |  |
| O8-Co3-O6 94.5(3)                             | N4 <sup>3</sup> -Zn4-O10 91.43(10)                |  |
| O8-Co3-O6 <sup>5</sup> 85.5(3)                | O9-Zn5-O23 98.71(10)                              |  |
| O8-Co3-O8 <sup>5</sup> 180.0(4)               | O9 <sup>4</sup> -Zn5-O25 97.20(10)                |  |
| O8-Co3-O10 <sup>5</sup> 91.8(3)               | O9 <sup>4</sup> -Zn5-O27 <sup>5</sup> 111.46(10)  |  |
| O8-Co3-O10 <sup>5</sup> 88.2(3)               | O23-Zn5-O25 157.89(11)                            |  |
| O8 <sup>5</sup> -Co3-O10 <sup>5</sup> 91.8(3) | O24-Zn5-O9 132.22(14)                             |  |
| O8-Co3-O10 <sup>5</sup> 88.2(3)               | O24--Zn5-O23 99.73(13)                            |  |
| O10-Co3-O10 <sup>5</sup> 180                  | O24-Zn5-O25 58.16(13)                             |  |
| O7-Co4-O10 97.0(3)                            | O24-Zn5-O27 110.25(15)                            |  |
| O7-Co4-O11 154.8(3)                           | O27 <sup>5</sup> -Zn5-O23 95.16(12)               |  |
| O7-Co4-O12 85.8(3)                            | O27 <sup>5</sup> -Zn5-O25 93.19(13)               |  |
| O7-Co4-N3 94.4(3)                             | O9 <sup>4</sup> -Zn6-O11 <sup>6</sup> 110.98(10)  |  |
| O9-Co4-O7 99.1(3)                             | O9 <sup>4</sup> -Zn6-O18 <sup>6</sup> 109.33(9)   |  |
| O9-Co4-O10 98.8(3)                            | O11 <sup>6</sup> -Zn6-O18 <sup>6</sup> 101.09(12) |  |
| O9-Co4-O11 93.6(3)                            | O22-Zn6-O9 <sup>4</sup> 119.46(10)                |  |
| O9-Co4-O12 174.3(3)                           | O22-Zn6-O11 <sup>6</sup> 107.53(13)               |  |
| O9-Co4-N3 89.1(3)                             | O22-Zn6-O18 <sup>6</sup> 106.83(11)               |  |
| O10-Co4-O11 59.4(3)                           | O9-Zn7-O17 <sup>5</sup> 110.83(9)                 |  |
| O10-Co4-N3 164.9(3)                           | O9-Zn7-O26 <sup>8</sup> 114.32(10)                |  |
| O12-Co4-O10 83.5(3)                           | O15-Zn7-O9 115.54(9)                              |  |
| O12-Co4-O11 83.1(3)                           | O15-Zn7-O17 <sup>5</sup> 110.81(10)               |  |
| O12-Co4-N3 87.5(3)                            | O15 -Zn7-O26 <sup>8</sup> 107.27(12)              |  |
| N3-Co4-O11 107.5(3)                           | O26 <sup>8</sup> -Zn7-O17 <sup>5</sup> 96.44(13)  |  |
|                                               | O9-Zn8-O12 <sup>5</sup> 109.75(10)                |  |
|                                               | O9-Zn8-O16 98.05(10)                              |  |
|                                               | O9-Zn8-O19 81.25(12)                              |  |
|                                               | O9-Zn8-N1 144.95(10)                              |  |
|                                               | O12-Zn8-O16 97.44(12)                             |  |
|                                               | O12 <sup>5</sup> -Zn8-O19 93.31(19)               |  |
|                                               | O12 <sup>5</sup> -Zn8-N1 102.41(11)               |  |
|                                               | O16-Zn8-O19 168.77(18)                            |  |
|                                               | N1-Zn8-O16 91.10(11)                              |  |
|                                               | N1-Zn8-O19 83.40(12)                              |  |
|                                               | Zn1-O1-Zn2 107.90(10)                             |  |
|                                               | Zn1-O1-Zn3 108.64(10)                             |  |
|                                               | Zn1-O1-Zn4 109.39(9)                              |  |
|                                               | Zn2-O1-Zn3 105.78(9)                              |  |
|                                               | Zn2-O1-Zn4 110.45(10)                             |  |
|                                               | Zn3 O1 Zn4 114.44(10)                             |  |
|                                               | Zn5 <sup>7</sup> -O9-Zn6 <sup>7</sup> 108.31(10)  |  |
|                                               | Zn5 <sup>7</sup> -O9-Zn8 114.37(10)               |  |
|                                               | Zn6 <sup>7</sup> -O9-Zn8 105.06(10)               |  |



|  |                                    |  |
|--|------------------------------------|--|
|  | Zn7-O9-Zn5 <sup>7</sup> 106.15(10) |  |
|  | Zn7-O9-Zn6 <sup>7</sup> 108.29(9)  |  |
|  | Zn7-O9-Zn8 114.41(10)              |  |

**Symmetry elements 1:** <sup>1</sup>1-X,2-Y,-Z; <sup>2</sup>1-X,2-Y,1-Z; <sup>3</sup>+X,+Y,-1+Z; <sup>4</sup>-X,1-Y,1-Z; <sup>5</sup>2-X,2-Y,1-Z; <sup>6</sup>+X,+Y,1+Z; <sup>7</sup>-X,2-Y,-Z; <sup>8</sup>3-X,2-Y,1-Z. **2:** <sup>1</sup>+X,-1/2-Y,1/2+Z; <sup>2</sup>+X,-1/2-Y,-1/2+Z; <sup>3</sup>1-X,1-Y,1-Z; <sup>4</sup>1+X,1/2-Y,1/2+Z; <sup>5</sup>+X,1/2-Y,1/2+Z; <sup>6</sup>1+X,+Y,1+Z; <sup>7</sup>-1+X,+Y,+Z. **3:** <sup>1</sup>2-X,1-Y,2-Z; <sup>2</sup>2-X,-Y,-Z; <sup>3</sup>1-X,1-Y,1-Z.

## References –

1. M. D. Hanwell, D. E. Curtis, D. C. Lonie, T. Vandermeersch, E. Zurek and G. R. Hutchison, *Journal of Cheminformatics*, 2012, DOI:10.1186/1758-2946-4-17.
